# Supplementary material
Source: PubMed Central journal article supplement (PMC4418866)
Supplement: pnas.201421961SI.pdf [file pnas.201421961SI.pdf]

# Supporting Information

Abelein et al. 10.1073/pnas.1421961112

## Sample Preparation

Recombinant Aβ<sub>40</sub> peptide was purchased from Alexo-Tech and samples were prepared as in ref. 1. Experiments were performed in 10 mM Hepes buffer, pH 7.4, in 10 or 100% D<sub>2</sub>O (for diffusion experiments) for NMR and 10 mM sodium-phosphate buffer, pH 7.2–7.4, with 0.02% NaN<sub>3</sub> for kinetics experiments, respectively. Zn<sup>2+</sup> ions were added using ZnCl<sub>2</sub> stock solutions.

## Aggregation Kinetics

**Experimental Setup.** ThT fluorescence aggregation kinetics were measured using a 96-well plate on a Fluostar Omega (BMG Labtech) fluorometer. ThT was diluted from a 4 mM ThT stock solution to a final concentration of 40 μM (unseeded experiments) or 100 μM (preseeded experiments). Experiments were performed at 37 °C under quiescent conditions and the signals were recorded in an interval time of 300 s for unseeded and 60 or 20 s for preseeded experiments. All peptide samples were prepared and kept on ice and quickly transferred to the 96-well plate just before measuring.

**Analysis.** Kinetic traces at different peptide concentrations with and without Zn<sup>2+</sup> in Aβ<sub>40</sub>:Zn<sup>2+</sup> 10:1 molar equivalents were primarily fitted to sigmoidal functions that can be described by  $F = F_0 + A / (1 + \exp[r_{max}(\tau_{1/2} - t)])$ , where  $\tau_{1/2}$  is the time for depletion of half of the monomer pool by aggregation and  $r_{max}$  is the maximum growth rate. Averaged  $\tau_{1/2}$  values (four or five replicates), which were weighted by their variances, show a dependence on the initial monomer concentration,  $m(0)$ , that is described by a power law  $m(0)^\gamma$  where  $\gamma$  is the half-time exponent. Accordingly, kinetic traces (five replicates) of 20 μM Aβ<sub>40</sub> at different Zn<sup>2+</sup> concentrations exhibit sigmoidal kinetic profiles whose averaged  $\tau_{1/2}$  values show an exponential dependence on the Zn<sup>2+</sup> concentration with  $\tau_{1/2} = \tau_0 \cdot \exp([Zn^{2+}]/c_e)$ .

In addition, a global fit analysis was performed including all aggregation kinetics data (see following sections).

**Kinetic Model of Aggregation.** We applied an aggregation kinetic model as proposed by Meisl et al. (2) that includes primary nucleation ( $k_n$ ), elongation ( $k_+$ ), and secondary nucleation ( $k_2$ ) where the reaction orders  $n_c$  and  $n_2$  describe primary and secondary nucleation events, respectively. In this model an equilibrium constant  $K_M$  is introduced to account for saturation of secondary nucleation following the terms of Michaelis–Menten kinetics (2). The primary and secondary reaction orders were set to  $n_2 = n_c = 2$  as previously reported for Aβ<sub>42</sub> (3) and Aβ<sub>40</sub> (2). In addition, the choice of  $n_2$  and  $n_c$  was validated by assigning one of them as an additional fitting parameter. These fits revealed values around 2 for  $n_2$  and  $n_c$  or worse fits (larger  $\chi^2$  values) for other values. In this model, the normalized fraction of fibril mass,  $M(t)/M(\infty)$ , is described by

$$\frac{M(t)}{M(\infty)} = 1 - \left( \frac{B_+ + C_+}{B_+ + C_+ e^{\kappa t}} \frac{B_- + C_+ e^{\kappa t}}{B_- + C_+} \right)^{\frac{k_2^2}{k_+^2}} e^{-k_\infty t} \quad [\text{S1}]$$

with global fit parameters that describe the formation of aggregates through primary nucleation,

$$\lambda = \sqrt{2k_+k_n m(0)^{n_c}} \quad [\text{S2}]$$

and secondary nucleation

$$\kappa = \sqrt{2k_+k_2 \frac{m(0)^{n_2+1}}{1 + m(0)^{n_2}/K_M}}, \quad [\text{S3}]$$

where  $m(0)$  is the initial monomer concentration and  $K_M$  is the Michaelis constant.

The other parameters are related to  $\lambda$  and  $\kappa$  by

$$B_\pm = (k_\infty \pm \tilde{k}_\infty) / (2\kappa) \quad [\text{S4}]$$

$$C_\pm = \pm \lambda^2 / (2\kappa^2) \quad [\text{S5}]$$

$$k_\infty = 2k_+P(\infty) \quad [\text{S6}]$$

$$\tilde{k}_\infty = \sqrt{k_\infty^2 - 2C_+C_- \kappa^2}. \quad [\text{S7}]$$

The long time limit of the aggregation number  $P(\infty)$  for  $n_2 = 2$  is given by (2)

$$2k_+P(\infty) = \sqrt{|-A(0) - 2k_+k_2m(0)K_M \log(K_M)/n_2|} \quad [\text{S8}]$$

with

$$A(0) = -\frac{2k_+k_n m(0)^{n_c}}{n_c} - 2k_+k_2m(0)K_M \frac{\log(K_M + m(0)^{n_2})}{n_2} - 2k_+k_2K_M m(0) \left( \frac{\sqrt{K_M} \arctan(m(0)/\sqrt{K_M})}{m(0)} - 1 \right). \quad [\text{S9}]$$

For a two-step secondary nucleation reaction the Michaelis constant  $K_M$  is defined by  $K_M = (k_b + k_2)/k_f$ , which is related to  $k_2$  by  $k_2 = \bar{k}_2/K_M$ . The rates  $k_f$  and  $k_b$  reflect the rate of attachment and detachment of  $n_2$  monomers to/from the fibril surface, respectively, and  $\bar{k}_2$  describes the subsequent release of the formed aggregate from the fibril surface.

Global fits were performed using all data from ThT fluorescence kinetics in an initial monomer concentration interval of 10–20 μM. Aggregation traces were normalized with respect to the initial and final fluorescence signals and averaged over four or five kinetic traces for each peptide concentration. Here, for each time point a variance weighted average was calculated. These normalized and variance weighted averaged kinetic traces were fitted globally using Eq. S1 where global fit parameters were  $\sqrt{k_+k_n}$ ,  $\sqrt{k_+k_2}$  and  $\sqrt{K_M}$  and the initial mass concentration was constrained to  $\pm 1$  μM of the experimentally determined monomer concentration. In a second fit, to check the quality of the fit by reducing the number of free parameters, the value of  $\sqrt{K_M}$  was held constant to the experimentally determined value, which led to the same fitting values but with a reduced fitting error.

## Half-Time Exponent

The half-time exponent  $\gamma$  can be derived from Eq. S1 and is given as (2)

$$\gamma = -0.5 \left( \frac{n_2}{1 + m(0)^{n_2}/K_M} + 1 \right). \quad [\text{S10}]$$

With  $n_2 = 2$  and an experimentally obtained half-time exponent of  $\gamma = -0.91 \pm 0.12$  (Fig. 1B) the mean value for an initial monomer range of 10–20  $\mu\text{M}$  is  $\sqrt{K_M} = 12.5 \pm 1.5 \mu\text{M}$ . This value was used in the global fit analysis for  $\text{A}\beta_{40}$  aggregation at different  $\text{Zn}^{2+}$  concentrations (Fig. 2A and Fig. S4).

### Attenuated Total Reflection Infrared

IR measurements were conducted at  $4\text{-cm}^{-1}$  resolution using a Bruker Vertex 70 spectrometer equipped with a SensIR 9-reflection diamond attenuated total reflection (ATR) accessory. The samples were taken from ThT fluorescence measurements at the end state and after centrifugation for 20 min the precipitate was dried with a gentle nitrogen stream on the diamond crystal. Spectra were averaged over 10 scans and normalized to the intensity of the secondary derivative minimum at  $1,625\text{--}1,629 \text{ cm}^{-1}$ , which is a typical  $\beta$ -sheet feature (4). For  $\text{A}\beta_{40}$  alone and in the presence of low zinc concentrations ( $\leq 2.5 \mu\text{M}$ ) the spectra are almost identical, indicating a similar morphology of the fibril structures. In contrast, at  $10 \mu\text{M}$   $\text{Zn}^{2+}$  the IR spectrum is clearly different, suggesting the formation of different fibril morphologies under these conditions (Fig. S1).

### Effect of Different $\text{Zn}^{2+}$ Concentrations

To investigate the effect of  $\text{Zn}^{2+}$  on the microscopic rate constants a global fit analysis was performed using aggregation traces (average of five replicates per time point) of  $20 \mu\text{M}$   $\text{A}\beta_{40}$  in the presence of  $0\text{--}2.5 \mu\text{M}$   $\text{Zn}^{2+}$ . Three different fits were performed where either  $k_n$ ,  $k_+$ , or  $k_2$  was effectively allowed to vary across different  $\text{Zn}^{2+}$  concentrations where, to reduce the numbers of freedom,  $m(0)$  and  $\sqrt{K_M}$  (set to  $12.5 \mu\text{M}$ ) were held constant. To investigate the effect on the secondary nucleation rate,  $k_2$ , the data were globally fitted to Eq. S1 where  $\sqrt{k_+k_n}$  was fixed to one global value for all  $\text{Zn}^{2+}$  concentrations whereas  $\sqrt{k_+k_2}$  was allowed to vary between different concentrations. With this constraint, the secondary nucleation rate is the only effective free fitting parameter. In contrast, when holding  $\sqrt{k_+k_2}$  fixed and allowing  $\sqrt{k_+k_n}$  to vary across different  $\text{Zn}^{2+}$  concentrations, the primary nucleation rate,  $k_n$ , is the sole effective free parameter. Similarly, to check the effect on the elongation rate,  $k_+$ , as the effective free fitting parameter,  $\sqrt{k_n/k_2}$  and  $\sqrt{k_+k_2}$  were defined as global fit parameters. For this, the first term in Eq. S9 was neglected as  $\mathcal{O}\left(\frac{2k_+k_n m(0)^{nc}}{nc}\right) \ll \mathcal{O}(\text{other terms})$ . When fitting  $\sqrt{k_n/k_2}$  to one global value and allowing  $\sqrt{k_+k_2}$  to vary,  $k_+$  is the effective free fitting parameter.

Whereas a fit with  $k_n$  as the effective free fitting parameter resulted in an insufficient fit ( $\chi^2 = 10.86$ ), the fits for  $k_2$  and  $k_+$  as free parameter describe equally well the aggregation kinetics with  $\chi^2$  values of 5.41 and 5.71 for  $k_2$  and  $k_+$  as free parameters, respectively (Fig. S4A). Both the relative elongation and secondary nucleation rate, where the other one is assumed to be unaffected, show about the same dependence on  $\text{Zn}^{2+}$  concentration (Fig. S4B). Thus, the effect of  $\text{Zn}^{2+}$  on  $\text{A}\beta_{40}$  aggregation can be described by a change of  $k_2$  and/or  $k_+$ . From this analysis it is, however, not possible to distinguish whether  $\text{Zn}^{2+}$  affects primarily  $k_2$  or  $k_+$  or both. The result from the global fit that the value of  $K_M$  did not significantly change in the presence of  $\text{Zn}^{2+}$  (Table S1) provides, however, evidence that primarily elongation reactions are inhibited by zinc. An unchanged  $K_M$  value indicates that both the attachment of peptides to the fibril surface and the formation and subsequent release of new aggregates are equally affected. The microscopic nature of these events is, however, fundamentally different and simultaneous inhibition of both processes seems less likely. To elucidate this issue in more detail preseeded experiments are performed that report on the effect on rate with which fibrils elongate (see the following section).

### Preseeded Aggregation Kinetics

Seeded experiments can be used to distinguish whether primary or secondary nucleation events are primarily affected by  $\text{Zn}^{2+}$  (5). In addition, at high seed concentration the initial slope is proportional to the elongation rate and effects of  $\text{Zn}^{2+}$  on the elongation can be quantified (5).

Seeds were taken from samples that reached the final aggregation state characterized by either ThT end-point fluorescence (Fig. S2A) or CD signal (Fig. S2B). Seeds used for experiments displayed in Fig. S3 were produced by incubating a  $10 \mu\text{M}$   $\text{A}\beta_{40}$  sample at  $37^\circ\text{C}$  under continuous agitation (stirring by a small magnet). The aggregation process was monitored all of the time by recording the CD signal. The CD signal displayed a two-state transition from a mainly random coil-like signal at the start to a final  $\beta$ -structure (Fig. S2B). After about 5 h the transition was completed and the CD signal remained unchanged, which defined the final aggregation state (Fig. S2B). Alternatively, seeds used for Fig. S4C, Right, were taken from an aggregated sample ( $45 \mu\text{M}$   $\text{A}\beta_{40}$ ) that was incubated with  $100 \mu\text{M}$  ThT at  $37^\circ\text{C}$  in a 96-well plate under quiescent conditions and its sigmoidal ThT fluorescence signal increase was recorded (Fig. S2A). The aggregated samples were homogenized by drawing the solutions 10 or more times up and down through a 27-gauge syringe (inner diameter  $0.21 \text{ mm}$ ) and subsequent sonication for 5 min. The aggregated and homogenized samples were then added to monomeric peptide as seeds. For very high seed concentrations (Fig. S4C, Left) monomeric peptide solutions at different  $\text{Zn}^{2+}$  concentrations were directly added to aggregated ThT end-point samples incubated with the same  $\text{Zn}^{2+}$  concentration, without any further treatment of the seeds.

Seeded kinetics experiments were performed under quiescent condition, first, for different  $\text{A}\beta_{40}$  concentrations with  $\text{Zn}^{2+}$  added at  $\text{A}\beta:\text{Zn}^{2+}$  10:1 molar equivalents and  $\sim 1 \mu\text{M}$  seeds (Fig. S3A) and, second, at constant  $\text{A}\beta_{40}$  concentration with different  $\text{Zn}^{2+}$  concentrations at two different seed:monomer ratios,  $3 \mu\text{M} : 19 \mu\text{M}$  and  $11.5 \mu\text{M} : 10 \mu\text{M}$  seed:monomer.

Aggregation traces of preseeded peptide at  $\sim 1 \mu\text{M}$  seeds showed a sigmoidal behavior and reached the final state before a significant signal increase of the unseeded samples was observed (Fig. S3A). Variance weighted mean aggregation half times (of four replicates) were significantly prolonged in the presence of zinc at  $\text{A}\beta:\text{Zn}^{2+}$  10:1 molar equivalents (Fig. S3B).

At large seed concentration new aggregates are generated predominately by adding monomeric peptide to fibril ends. The initial slope is, hence, proportional to the elongation rate (5). At very high seed concentration ( $11.5 \mu\text{M} : 10 \mu\text{M}$  seed:monomer) the aggregation behavior clearly exhibits a concave shape, that is, the seed concentration is above the critical seed concentration and the maximal growth rate is largest at the start (6). The initial slope was determined by a linear fit to first 18 and 30 min for  $11.5 \mu\text{M} : 10 \mu\text{M}$  and  $3 \mu\text{M} : 19 \mu\text{M}$  seed:monomer ratio, respectively, neglecting the very first time points due to temperature equilibration. Aggregation traces (averaged over three to five replicates) at different  $\text{Zn}^{2+}$  concentration yield a  $\text{Zn}^{2+}$ -dependent elongation rate (Fig. S4C and Fig. 2D). The relative elongation rate decreases with increasing  $\text{Zn}^{2+}$  concentration and shows about the same  $\text{Zn}^{2+}$  dependence for both seed:monomer ratios as was found from the global fit analysis of unseeded peptide (Fig. 2D and Fig. S4C, inset graphs).

### NMR

$^1\text{H}$ - $^{15}\text{N}$  HSQC,  $^{15}\text{N}$  CPMG relaxation dispersion, and diffusion experiments were acquired on a 700-MHz Bruker Avance spectrometer equipped with a cryogenic probe.

$^{15}\text{N}$  CPMG relaxation rates were recorded of  $75 \mu\text{M}$   $^{15}\text{N}$ - $\text{A}\beta_{40}$  with  $20 \mu\text{M}$   $\text{Zn}^{2+}$  for five different temperatures from 278 to 290 K in steps of 3 K (same sample) as well as with  $10 \mu\text{M}$   $\text{Zn}^{2+}$  and without  $\text{Zn}^{2+}$  (different samples) both at 281 K using a CPMG

pulse scheme (7) with a mixing time of 120 ms and 11 different delays between the 180° pulses as well as a reference experiment without the mixing period. To reduce any putative long-time-scale-event influences, relaxation dispersion data sampling was performed in an interleaved acquisition scheme meaning that slow aggregation affects all CPMG frequencies in the same manner. Relaxation rates were determined from cross-peak heights. These rates including data from five temperatures and two Zn<sup>2+</sup> concentrations were fitted to a two-state chemical exchange model (8–10) as described in refs. 11 and 12. The calculated relaxation rates  $R_2^0$  and the absolute chemical shift differences  $|\Delta\delta|$  are residue-specific fitting parameters, whereas the population of the second state  $p_B$  and the chemical exchange rate  $k_{ex}$  are fitted as global parameters.  $\Delta\delta$  was constrained to the same value for all temperatures and Zn<sup>2+</sup> concentrations. Only residues with relaxation dispersion profiles featuring F-test values of  $P < 0.03$  and 3-s<sup>-1</sup> difference between the first and last point for 278–284 K were used for the fitting, which applied for eight residues. With 20 μM Zn<sup>2+</sup> the first five (four) points of F4, R5, and S8 are close to the noise level and were therefore excluded from the fitting. To check the robustness of the fit including only the eight residues with significantly high relaxation dispersion amplitudes, a fit including all residues was also performed. This fit revealed essentially the same chemical shift changes for the eight high-amplitude profile residues and very small values for all other residues (Fig. 3C).

Diffusion experiments were performed at 281 K in D<sub>2</sub>O on three different samples without and with 20 and 40 μM Zn<sup>2+</sup> where the same small amount of water/Zn<sup>2+</sup> solution (volume H<sub>2</sub>O ca. 2%) was added to each sample. A list of 16 different gradient strengths with linear spacing, a gradient pulse length of 3 ms, and a diffusion time of 100 ms were applied for the diffusion measurements. Diffusion coefficients were determined using the integrated signals of the aromatic side chain protons. Errors were estimated from SD of five or more measurements (on the same sample). The hydrodynamic radius,  $R_H$ , was calculated from the translational diffusion coefficient,  $D_t$ , through the Stokes–Einstein equation,  $R_H = k_B T / (6\pi\eta D_t)$ , where  $k_B$  is the Boltzmann's constant and  $\eta$  the dynamic viscosity.

<sup>1</sup>H-<sup>15</sup>N HSQC cross-peaks in the presence of 15 mM LiDS were assigned using ref. 13 (determined at 298 K) and extrapolated to 281 K with a temperature scan in steps of 3 K.

### Thermodynamics of Zn<sup>2+</sup> Binding

**Two-State Model for Zn<sup>2+</sup> Binding.** The temperature dependence of the Zn<sup>2+</sup> bound state may be used to determine reaction-specific thermodynamic parameters. Assuming a 1:1 complex for the reaction product the Zn<sup>2+</sup> binding process can be described by

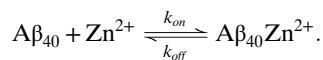

The apparent dissociation constant  $K_D$  of this binding is given by the population of the bound state,  $p_B$ , and the initial Zn<sup>2+</sup> and Aβ concentrations,  $[Zn^{2+}]_0$  and  $[A\beta]_0$ :

$$K_D^{app} = \frac{(1 - p_B) \cdot ([Zn^{2+}]_0 - p_B[A\beta]_0)}{p_B}. \quad [S11]$$

The values of  $K_D^{app}$  at different temperatures are listed in Table 1.

**Three-State Model for Zn<sup>2+</sup> Binding.** To describe folding of the N terminus around the Zn<sup>2+</sup> ion as the rate-limiting step we applied a three-state model that includes Zn<sup>2+</sup> binding to the peptide's N terminus and consequent folding of the N terminus:

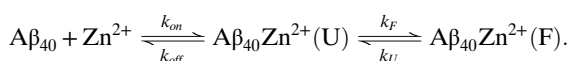

The initial Zn<sup>2+</sup> binding may be described by a dissociation constant  $K_D = 6.6 \mu\text{M}$  obtained from tyrosine fluorescence experiments using competitive titration with copper ions (14). The population of peptide that has a Zn<sup>2+</sup> ion bound,  $p_{Zn}$ , may be calculated from the initial Aβ and Zn<sup>2+</sup> concentrations,  $[A\beta]_0$  and  $[Zn^{2+}]_0$  and the dissociation constant by

$$p_{Zn} = \frac{([A\beta]_0 + [Zn^{2+}]_0 + K_D)}{2[A\beta]_0} \frac{\sqrt{([A\beta]_0 + [Zn^{2+}]_0 + K_D)^2 - 4[A\beta]_0[Zn^{2+}]_0}}{2[A\beta]_0}. \quad [S12]$$

The fraction of peptides with a bound Zn<sup>2+</sup> ion and the corresponding concentration are displayed in Table S2.

**Gibbs Free Energy.** The Gibbs free energy is calculated from the equilibrium constant,  $K_{eq}^{U \rightarrow F}$ , of the three-state model by

$$K_{eq}^{U \rightarrow F}(T) = \frac{p_F(T)}{p_U(T)} = \frac{p_B(T)}{p_{Zn} - p_B(T)} \quad [S13]$$

$$\Delta G^{U \rightarrow F}(T) = -RT \ln K_{eq}^{U \rightarrow F}(T), \quad [S14]$$

where the dissociation constant  $K_D$  and, hence, the Zn<sup>2+</sup> bound population  $p_{Zn}$  are assumed to be temperature-independent and  $p_F = p_B$  is the population of the folded state determined by relaxation dispersion measurements.

The simplest description for the Gibbs free energy is a linear dependence on temperature where  $\Delta H^0$  and  $\Delta S^0$  do not feature an explicit temperature dependence:

$$\Delta G(T) = \Delta H^0 - T\Delta S^0. \quad [S15]$$

To describe the curvature of the data points in Fig. 3E and Fig. S9 correctly a heat capacity is introduced describing an explicit temperature dependence of the enthalpy by  $\Delta C_p = (\partial H / \partial T)_p$  (15):

$$\Delta G(T) = \Delta H_{T_m} - T\Delta S_{T_m} + \Delta C_p(T - T_m) - T\Delta C_p \ln(T/T_m), \quad [S16]$$

where the enthalpy and entropy are defined at a reference temperature,  $T_m$ . The temperature dependence of the enthalpy and entropy are given by

$$\Delta H(T) = \Delta H(T_m) + \Delta C_p(T - T_m) \quad [S17]$$

$$\Delta S(T) = \Delta S(T_m) + \Delta C_p \ln(T/T_m). \quad [S18]$$

We chose the reference temperature as a melting temperature by  $T_m = \Delta H^0 / \Delta S^0$  where  $\Delta H^0$  and  $\Delta S^0$  are determined from a linear fit at higher temperatures. The explicit temperature dependence of  $\Delta H(T)$  and  $\Delta S(T)$  is displayed in Fig. S9. To test the impact of the previously determined  $K_D = 6.6 \mu\text{M}$  (14) we calculated  $\Delta G(T)$  assuming an uncertainty of 5  $K_D$  and  $K_D/5$  (Fig. S9). We found that the absolute values of  $\Delta G(T)$  are shifted whereas the overall behavior is conserved.

### Estimation of Population of Folded State from Diffusion Data

The measured translational diffusion coefficient,  $D_{obs}$ , is given as the population weighted average of the diffusion coefficients of Zn<sup>2+</sup>-bound folded peptide,  $D_B$ , and the nonfolded population

(including free and  $\text{Zn}^{2+}$ -bound unfolded peptides),  $D_{nF}$ , with  $D_{nF} \approx D_{free}$ :

$$D_{obs} = (1 - p_B) \cdot D_{free} + p_B \cdot D_B. \quad [\text{S19}]$$

Using the population of the bound state as determined by relaxation dispersion measurements in the presence of  $20 \mu\text{M Zn}^{2+}$  the diffusion coefficient of the folded state can be determined, when assuming the same diffusion coefficient of the bound state,  $D_B$ ,

at  $20$  and  $40 \mu\text{M Zn}^{2+}$ . The bound population in the presence of  $40 \mu\text{M Zn}^{2+}$  is thereby given by

$$p_{B,40\mu\text{M}} = \frac{D_{obs,40\mu\text{M}} - D_{free}}{D_B - D_{free}} = 12.6\%. \quad [\text{S20}]$$

This estimate indicates that the population of folded peptide increases linearly with increasing  $\text{Zn}^{2+}$  concentration (Fig. S8). With Eq. S11 the apparent dissociation constant can be estimated to  $\sim 210 \mu\text{M}$ .

1. Abelein A, Bolognesi B, Dobson CM, Gräslund A, Lendel C (2012) Hydrophobicity and conformational change as mechanistic determinants for nonspecific modulators of amyloid  $\beta$  self-assembly. *Biochemistry* 51(1):126–137.
2. Meisl G, et al. (2014) Differences in nucleation behavior underlie the contrasting aggregation kinetics of the A $\beta$ 40 and A $\beta$ 42 peptides. *Proc Natl Acad Sci USA* 111(26):9384–9389.
3. Cohen SIA, et al. (2013) Proliferation of amyloid- $\beta$ 42 aggregates occurs through a secondary nucleation mechanism. *Proc Natl Acad Sci USA* 110(24):9758–9763.
4. Barth A (2007) Infrared spectroscopy of proteins. *Biochim Biophys Acta* 1767(9):1073–1101.
5. Cohen SIA, Vendruscolo M, Dobson CM, Knowles TPJ (2012) From macroscopic measurements to microscopic mechanisms of protein aggregation. *J Mol Biol* 421(2-3):160–171.
6. Cohen SIA, et al. (2011) Nucleated polymerization with secondary pathways. I. Time evolution of the principal moments. *J Chem Phys* 135(6):065105.
7. Tollinger M, Skrynnikov NR, Mulder FA, Forman-Kay JD, Kay LE (2001) Slow dynamics in folded and unfolded states of an SH3 domain. *J Am Chem Soc* 123(46):11341–11352.
8. Palmer AG, 3rd, Kroenke CD, Loria JP (2001) Nuclear magnetic resonance methods for quantifying microsecond-to-millisecond motions in biological macromolecules. *Methods Enzymol* 339:204–238.
9. Carver J, Richards R (1972) A general two-site solution for the chemical exchange produced dependence of  $T_2$  upon the Carr-Purcell pulse separation. *J Magn Reson* 6(1):89–105.
10. Davis DG, Perlman ME, London RE (1994) Direct measurements of the dissociation-rate constant for inhibitor-enzyme complexes via the T1 rho and T2 (CPMG) methods. *J Magn Reson B* 104(3):266–275.
11. Abelein A, Lang L, Lendel C, Gräslund A, Danielsson J (2012) Transient small molecule interactions kinetically modulate amyloid  $\beta$  peptide self-assembly. *FEBS Lett* 586(22):3991–3995.
12. Abelein A, et al. (2013) Formation of dynamic soluble surfactant-induced amyloid  $\beta$  peptide aggregation intermediates. *J Biol Chem* 288(32):23518–23528.
13. Jarvet J, Danielsson J, Damberg P, Oleszczuk M, Gräslund A (2007) Positioning of the Alzheimer Abeta(1-40) peptide in SDS micelles using NMR and paramagnetic probes. *J Biomol NMR* 39(1):63–72.
14. Danielsson J, Pierattelli R, Banci L, Gräslund A (2007) High-resolution NMR studies of the zinc-binding site of the Alzheimer's amyloid beta-peptide. *FEBS J* 274(1):46–59.
15. Oliveberg M, Tan YJ, Fersht AR (1995) Negative activation enthalpies in the kinetics of protein folding. *Proc Natl Acad Sci USA* 92(19):8926–8929.

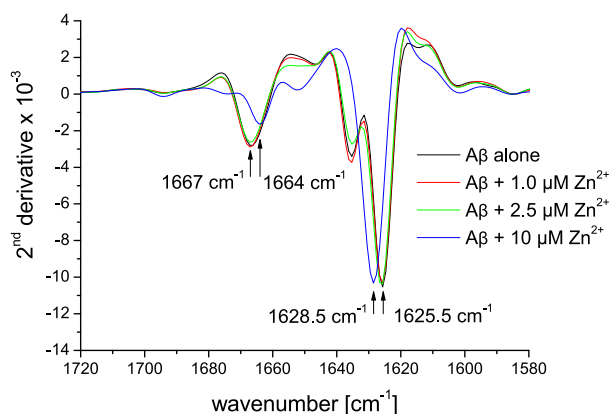

**Fig. S1.** ATR-Infrared spectra of aged  $\text{A}\beta_{40}$  samples incubated at different  $\text{Zn}^{2+}$  concentrations and recorded as dried films. The films were obtained from precipitates (after 20 min of centrifugation) of ThT fluorescence end-point samples. The second derivative of the IR absorbance is displayed and the curves are normalized to same intensity of the minimum at  $1,625\text{--}1,629 \text{ cm}^{-1}$ . For  $\text{A}\beta_{40}$  alone and in the presence of low zinc concentrations ( $\leq 2.5 \mu\text{M}$ ) the spectra are almost identical, indicating a similar morphology of the fibril structures. In contrast, at  $10 \mu\text{M Zn}^{2+}$  the IR spectrum is clearly different, suggesting the formation of different fibril morphologies under these conditions.

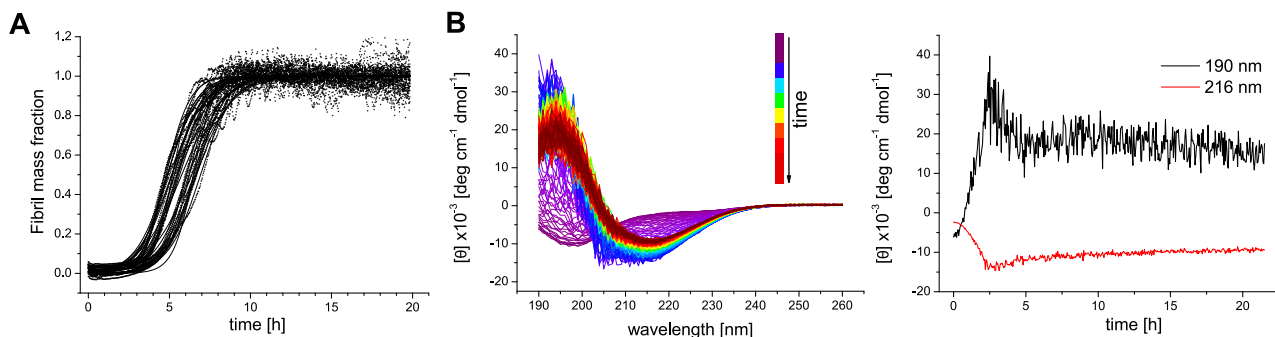

**Fig. S2.** Aggregation kinetics of samples whose final states were used for seeding experiments. (A) ThT fluorescence of  $45 \mu\text{M A}\beta_{40}$  was monitored at  $37 \text{ }^\circ\text{C}$  and under quiescent conditions. (B) Far-UV CD kinetics of  $10 \mu\text{M A}\beta$  recorded at  $37 \text{ }^\circ\text{C}$  and continuous stirring. The spectrum shows a transition from random coil-like at the start to a final state that exhibited a  $\beta$ -structure.

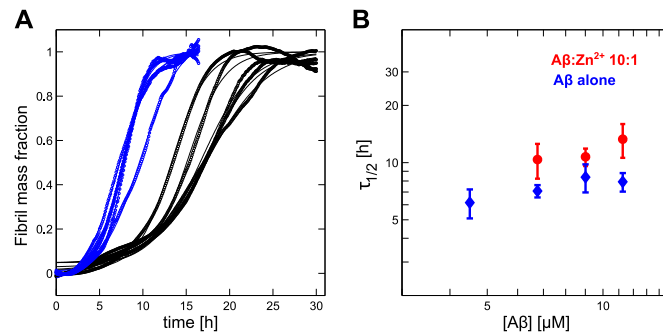

**Fig. S3.** (A) Aggregation kinetics under quiescent conditions of 10  $\mu\text{M}$  A $\beta$  (black) and 11.3  $\mu\text{M}$  A $\beta$  with 1  $\mu\text{M}$  seeds (blue). The intensity was normalized to the same final signal. (B) Fitted  $\tau_{1/2}$  values (from sigmoidal fits) under quiescent conditions for seeded A $\beta$  samples without (blue) and with (red) Zn $^{2+}$  at molar equivalents of A $\beta_{40}$ :Zn $^{2+}$  10:1.

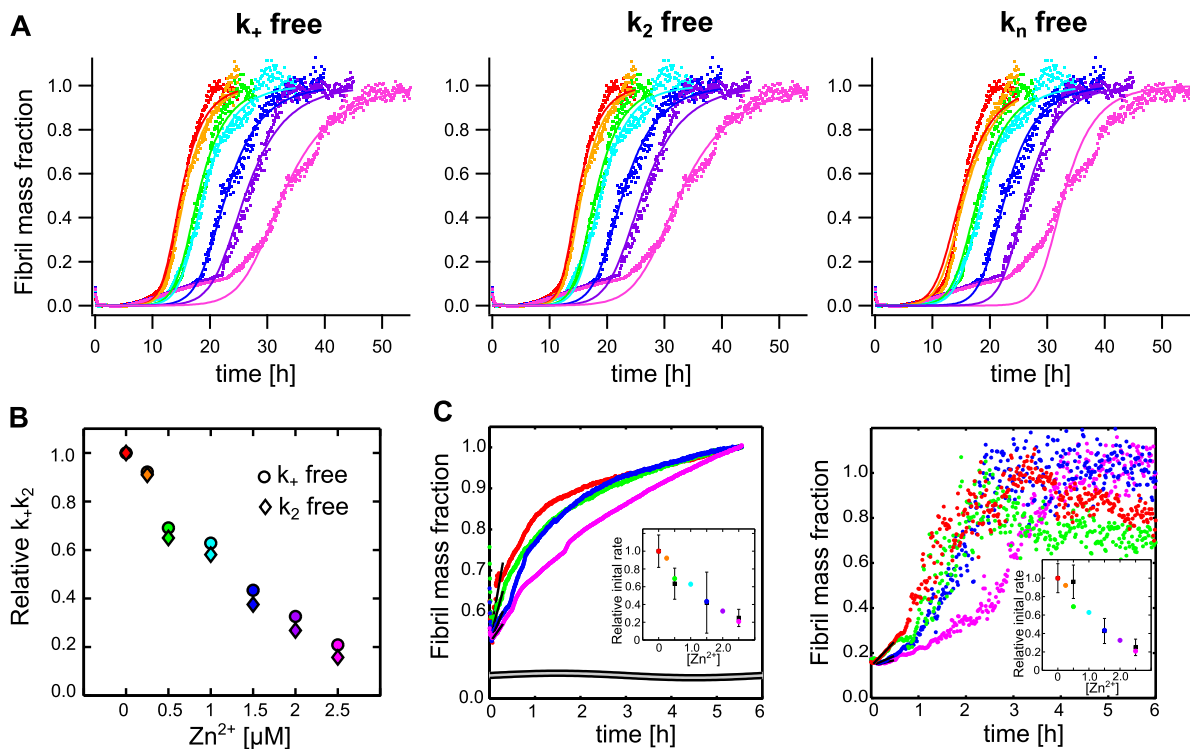

**Fig. S4.** (A) Global fit analysis of 20  $\mu\text{M}$  A $\beta_{40}$  in the presence of 0–2.5  $\mu\text{M}$  Zn $^{2+}$  where either  $k_n$ ,  $k_2$ , or  $k_+$  is the effective free fitting parameter. The  $\chi^2$  values for the different fits are 10.86 ( $k_n$  free), 5.41 ( $k_2$  free), and 5.71 ( $k_+$  free). The color code used is 0 (red), 0.25 (orange), 0.5 (green), 1 (cyan), 1.5 (blue), 2 (violet), and 2.5 (pink)  $\mu\text{M}$  Zn $^{2+}$ . (B) Relative global fit parameter (squared),  $k_+k_2$ , where one microscopic rate is the effective free fitting parameter and the other one is effectively constant. (C) Preformed fibrils were added to monomeric A $\beta_{40}$  at different Zn $^{2+}$  concentrations and where the initial slope (black line) was fitted to averaged aggregation traces. The experiment was performed at 11.5  $\mu\text{M}$  seeds to 10  $\mu\text{M}$  monomers (Left), and 3  $\mu\text{M}$  seeds to 19  $\mu\text{M}$  monomers (Right). The inserted graphs display the initial rates compared with the relative elongation rates obtained from the global fit analysis.

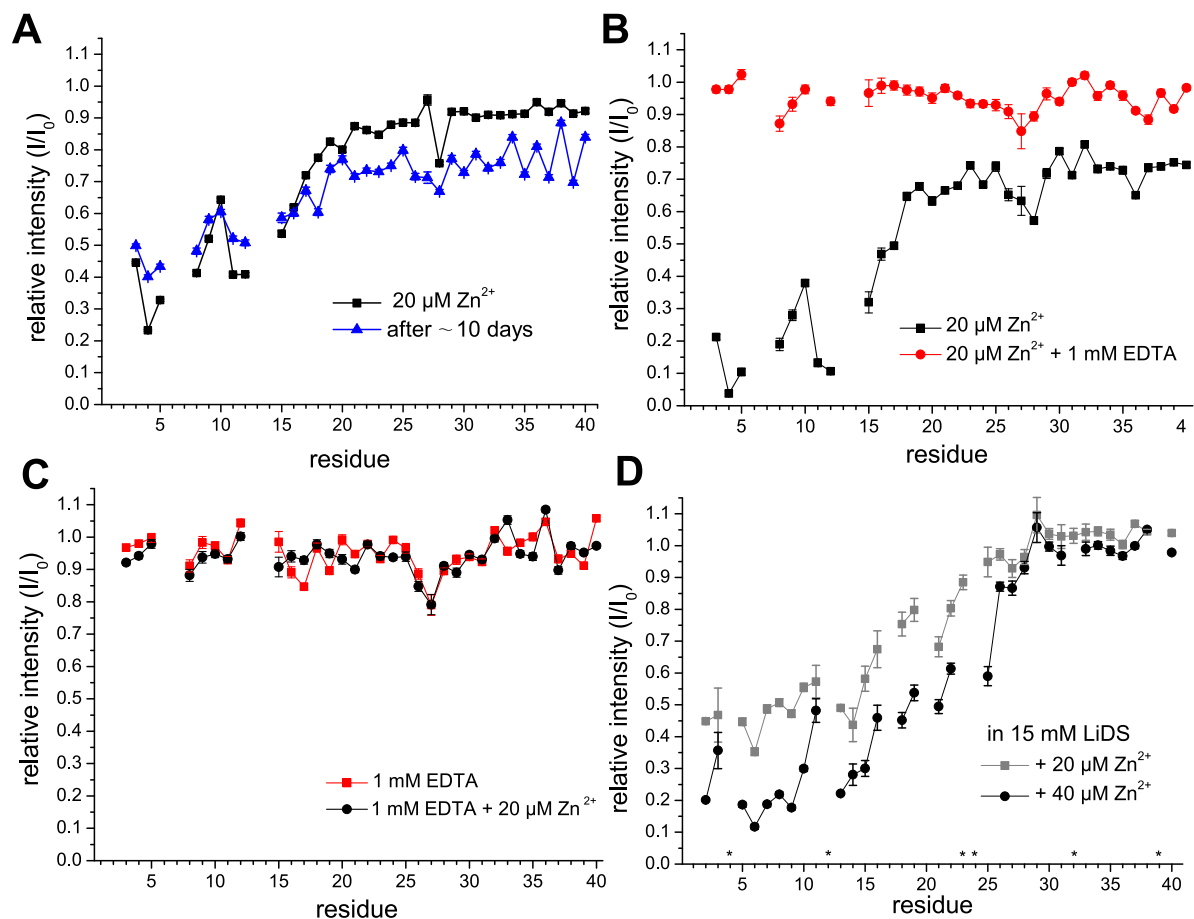

**Fig. S5.** (A) Relative  $^1\text{H}$ - $^{15}\text{N}$  HSQC cross-peak intensity of  $75\ \mu\text{M}$   $\text{A}\beta_{40}$  in 10 mM Hepes buffer, pH 7.4, at 278 K upon addition of  $20\ \mu\text{M}$   $\text{ZnCl}_2$  before (black) and after the relaxation dispersion measurements at different temperatures (278–290 K) performed in  $\sim 10$  d. (B and C) Relative  $^1\text{H}$ - $^{15}\text{N}$  HSQC cross-peak intensity of  $75\ \mu\text{M}$   $\text{A}\beta_{40}$  in 10 mM Hepes buffer, pH 7.2, at 281 K upon addition of  $20\ \mu\text{M}$   $\text{Zn}^{2+}$  followed by 1 mM EDTA (B) and in reverse order (C) showing the reversible signal intensity loss in the N-terminal part of the peptide. The small signal loss in the C terminus may be assigned to formation of small amounts of aggregates. The histidine mediated zinc coordination is highly pH-dependent, and at pH 5.3 virtually no binding is observed (1). (D) Relative  $^1\text{H}$ - $^{15}\text{N}$  HSQC cross-peak intensities of  $75\ \mu\text{M}$   $\text{A}\beta$  in 10 mM Hepes buffer, pH 7.1, with 15 mM LiDS at 281 K upon addition of 20 (light gray) and 40  $\mu\text{M}$   $\text{Zn}^{2+}$  (black). Residues marked with a star showed overlap with other residues and were excluded from the analysis. Error bars display the signal-to-noise ratio.

1. Ghalebani L, Wahlström A, Danielsson J, Wärmländer SKTS, Gräslund A (2012) pH-dependence of the specific binding of Cu(II) and Zn(II) ions to the amyloid- $\beta$  peptide. *Biochem Biophys Res Commun* 421(3):554–560.

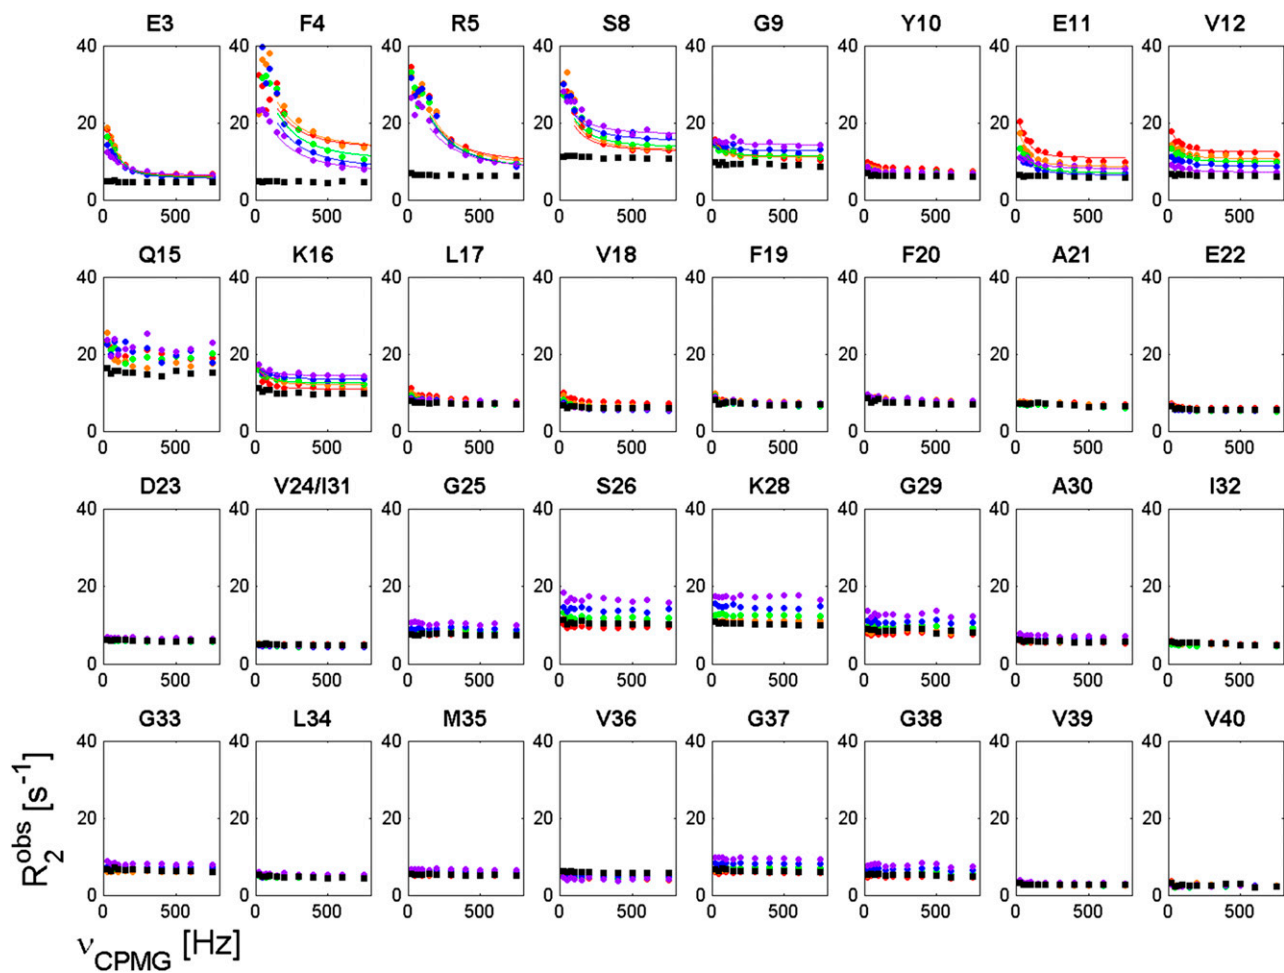

**Fig. S6.** Relaxation dispersion profiles for A $\beta$  in the presence of 20  $\mu\text{M}$   $\text{Zn}^{2+}$  (circles) at 278 (red), 281 (orange), 284 (green), 287 (blue), and 290 K (violet) and A $\beta$  alone at 281 K (black squares). The global fit routine included data from eight residues with significant relaxation dispersion amplitudes at five temperatures with two  $\text{Zn}^{2+}$  concentrations at 281 K.





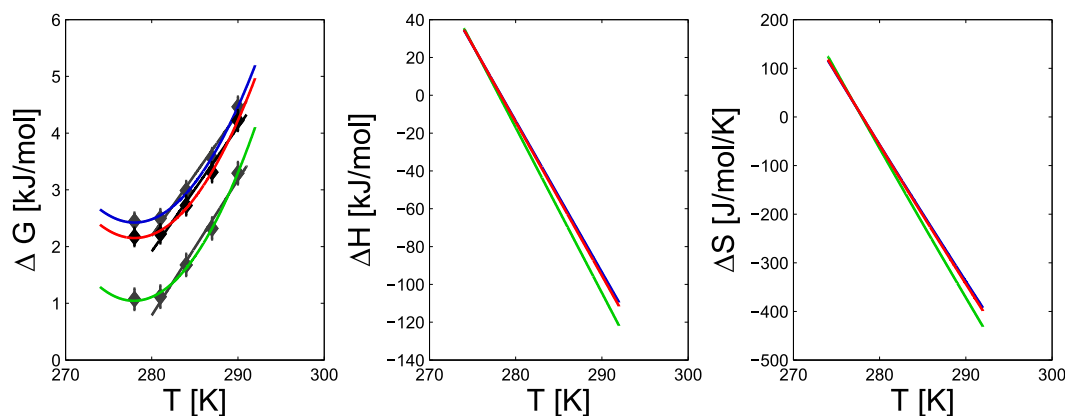

**Fig. S9.** Estimation of error impact of  $K_D$  on thermodynamic parameters. A uncertainty factor of 5 was assumed, that is,  $5K_D$  (green) and  $K_D/5$  (blue). The thermodynamic parameters were calculated according to Eqs. S16, S17, and S18.

**Table S1.** Global fit parameters for  $A\beta_{40}$  alone and in the presence of  $Zn^{2+}$  at  $A\beta:Zn^{2+}$  10:1 molar equivalents were obtained using Eq. S1

| Fitting parameter                                | $A\beta$ alone                                                                                      | $A\beta:Zn^{2+}$ 10:1         |
|--------------------------------------------------|-----------------------------------------------------------------------------------------------------|-------------------------------|
| $\sqrt{k_1 k_+}$ , $M^{-1} \cdot s^{-1}$         | $2.3 \pm 0.3 \cdot 10^{-2}$                                                                         | $0.98 \pm 0.08 \cdot 10^{-2}$ |
| $\sqrt{k_+ k_2}$ , $M^{-3/2} \cdot s^{-1}$       | $3.85 \cdot 10^3^*$                                                                                 | $2.15 \cdot 10^3^*$           |
| $\sqrt{K_M}$ , $\mu M$                           | $14.5 \pm 2.6$                                                                                      | $11.6 \pm 0.6$                |
| $m(0)$ $A\beta$ alone, <sup>†</sup> $\mu M$      | $10.6 \pm 0.3$ ; $11.1 \pm 0.4$ ; $13.4 \pm 0.6$ ; $15.8 \pm 1.0$ ; $17.5 \pm 1.3$ ; $19.0 \pm 1.6$ |                               |
| $m(0)$ $A\beta + Zn^{2+}$ , <sup>†</sup> $\mu M$ | $10.3 \pm 0.1$ ; $11.0 \pm 0.1$ ; $14.5 \pm 0.3$ ; $17.0 \pm 0.4$ ; $18.1 \pm 0.5$ ; $19.0 \pm 0.5$ |                               |

Errors are displayed as fitting errors, which report on the quality of the fit, whereas experimental errors may be substantially larger.

\*Fitting error  $< 2 \cdot 10^{-1} \cdot M^{-3/2} \cdot s^{-1}$ .

<sup>†</sup>Constrained to  $\pm 1 \mu M$  of experimentally determined monomer concentration.

**Table S2.** Estimation of  $Zn^{2+}$  bound population from fluorescence titration experiments using Eq. S12 with a total peptide concentration of  $75 \mu M$

| Amount zinc-bound peptide    | $20 \mu M Zn^{2+}$ | $10 \mu M Zn^{2+}$ |
|------------------------------|--------------------|--------------------|
| $p_{Zn}$ , %                 | 24                 | 12                 |
| $[A\beta]_{bound}$ , $\mu M$ | 17.9               | 9.1                |
